# Supplementary material for: Substrate-Borne Vibratory Communication during Courtship in Drosophila melanogaster
Source: PubMed Central journal article supplement (PMC3502867; doi:10.1016/j.cub.2012.09.042), 2012-11-20
Supplement: mmc7.pdf [file mmc7.pdf]

Current Biology, Volume 22

## Supplemental Information

### Substrate-Borne Vibratory

### Communication during Courtship

### in *Drosophila melanogaster*

Caroline C.G. Fabre, Berthold Hedwig, Graham Conduit, Peter A. Lawrence, Stephen F. Goodwin, and José Casal

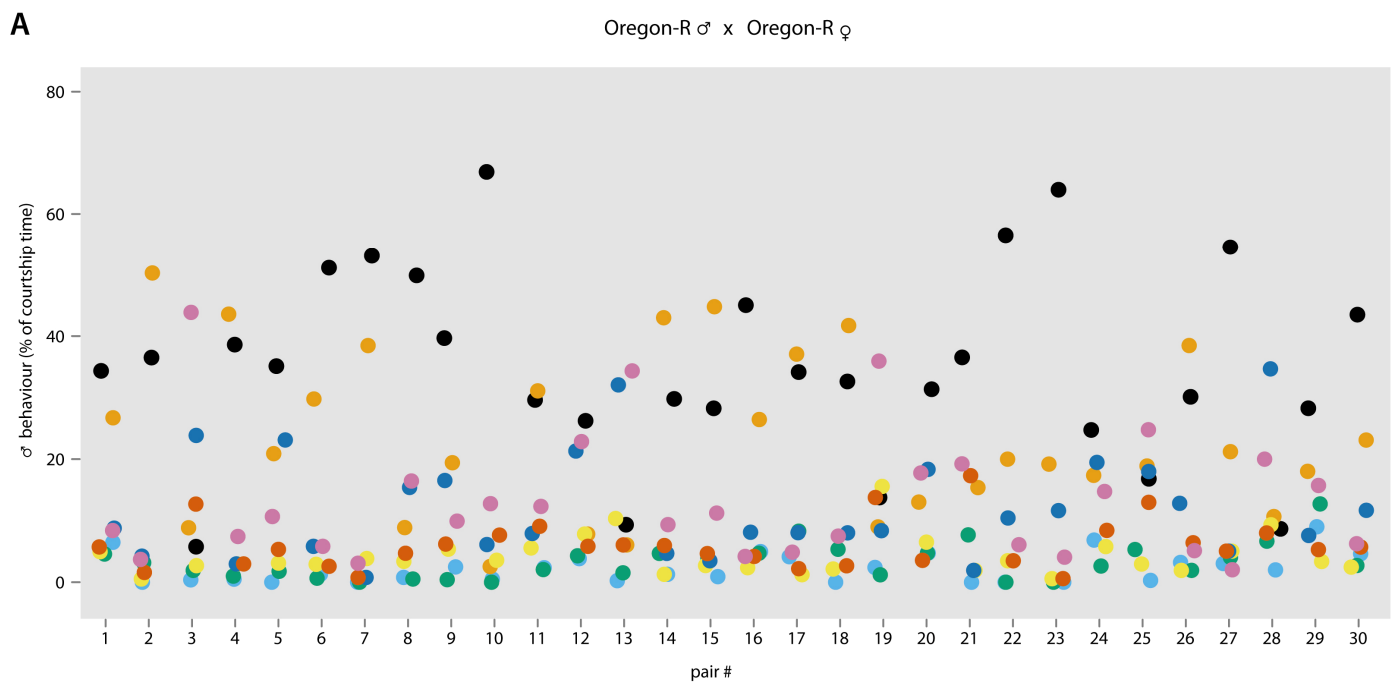

**B**

|            |   | ♂ behaviour         |                 | % of courtship time |      | bout duration (s) |      |
|------------|---|---------------------|-----------------|---------------------|------|-------------------|------|
|            |   | abdominal quivering | wing fluttering | mean                | ±    | mean              | ±    |
| ♀ moving   | ● | -                   | -               | 35.16               | 5.59 | 6.50              | 1.92 |
|            | ● | +                   | -               | 2.21                | 0.87 | 1.15              | 0.27 |
|            | ● | -                   | +               | 23.72               | 4.77 | 3.06              | 0.33 |
| ♀ immobile | ● | +                   | +               | 3.28                | 1.05 | 1.39              | 0.29 |
|            | ● | -                   | -               | 4.19                | 1.14 | 2.00              | 0.33 |
|            | ● | +                   | -               | 12.04               | 3.08 | 3.56              | 0.74 |
|            | ● | -                   | +               | 6.05                | 1.41 | 1.81              | 0.19 |
|            | ● | +                   | +               | 13.35               | 3.73 | 2.61              | 0.37 |

C

*Number of bouts*

| female<br>mobility (M) | male<br>quivering (Q) | male<br>fluttering (F) | N   |
|------------------------|-----------------------|------------------------|-----|
| moving                 | -                     | -                      | 497 |
| moving                 | +                     | -                      | 134 |
| moving                 | -                     | +                      | 591 |
| moving                 | +                     | +                      | 187 |
| immobile               | -                     | -                      | 157 |
| immobile               | +                     | -                      | 264 |
| immobile               | -                     | +                      | 257 |
| immobile               | +                     | +                      | 412 |

*Analysis of chi-square Deviance Table  
Generalised Linear Model (N~M\*Q\*F)*

|       | Df | Deviance Resid. | Df | Resid. | Dev. Pr(>Chi) |     |
|-------|----|-----------------|----|--------|---------------|-----|
| NULL  | 7  | 619.48          |    |        |               |     |
| M     | 1  | 40.83           | 6  | 578.65 | 1.659e-10     | *** |
| Q     | 1  | 102.76          | 5  | 475.89 | < 2.2e-16     | *** |
| F     | 1  | 62.70           | 4  | 413.19 | 2.410e-15     | *** |
| M:Q   | 1  | 401.90          | 3  | 11.29  | < 2.2e-16     | *** |
| M:F   | 1  | 9.59            | 2  | 1.70   | 0.001957      | **  |
| Q:F   | 1  | 0.38            | 1  | 1.31   | 0.535254      |     |
| M:Q:F | 1  | 1.31            | 0  | 0.00   | 0.251990      |     |

Signif. codes: 0 '\*\*\*' 0.001 '\*\*' 0.01 '\*' 0.05 '.' 0.1 ' ' 1

Model: poisson, link: log

Response: N

Terms added sequentially (first to last)

D

Mosaic plots of the Generalised Linear Models  $(N-M+(or)Q+(or)F)$

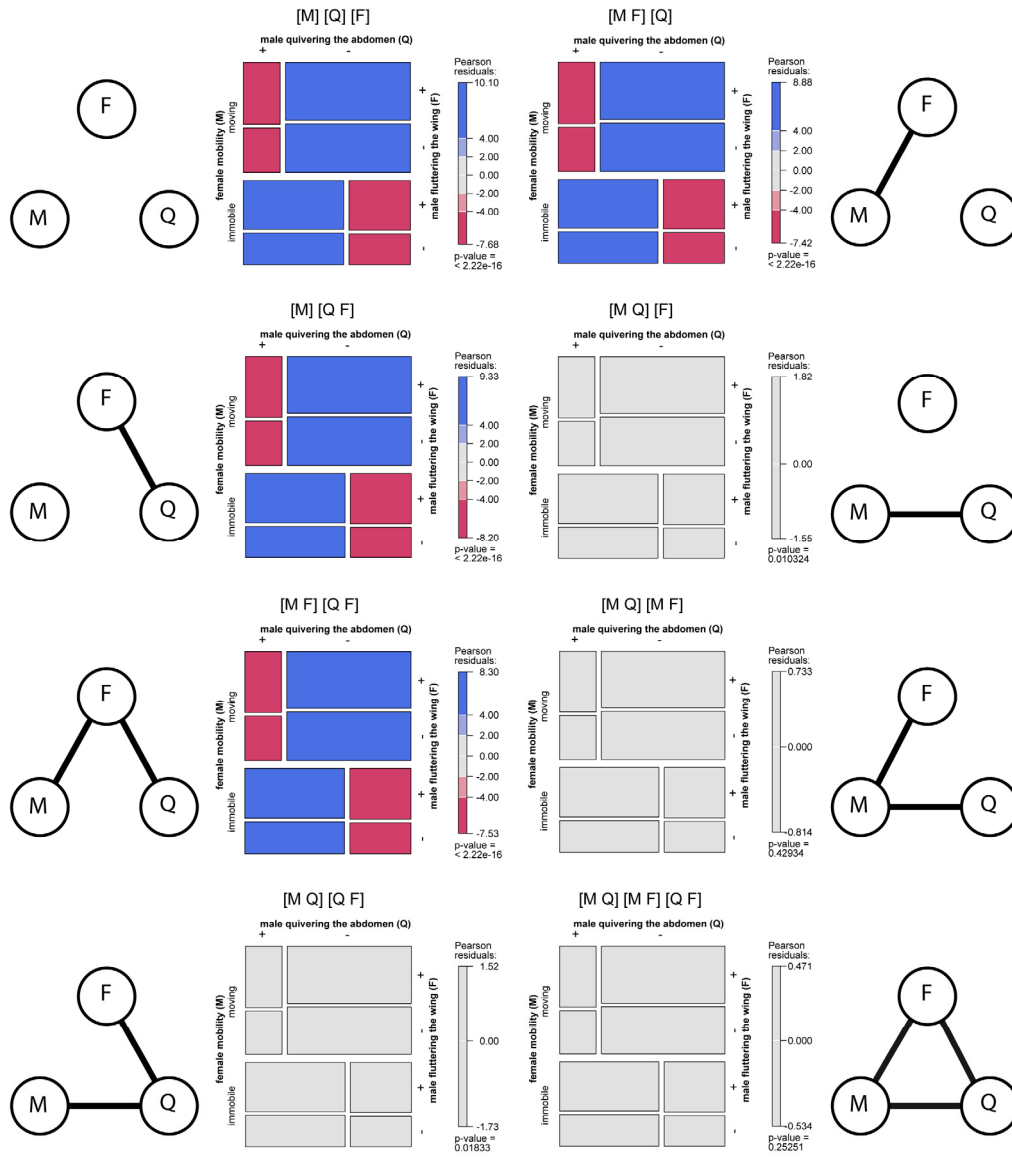

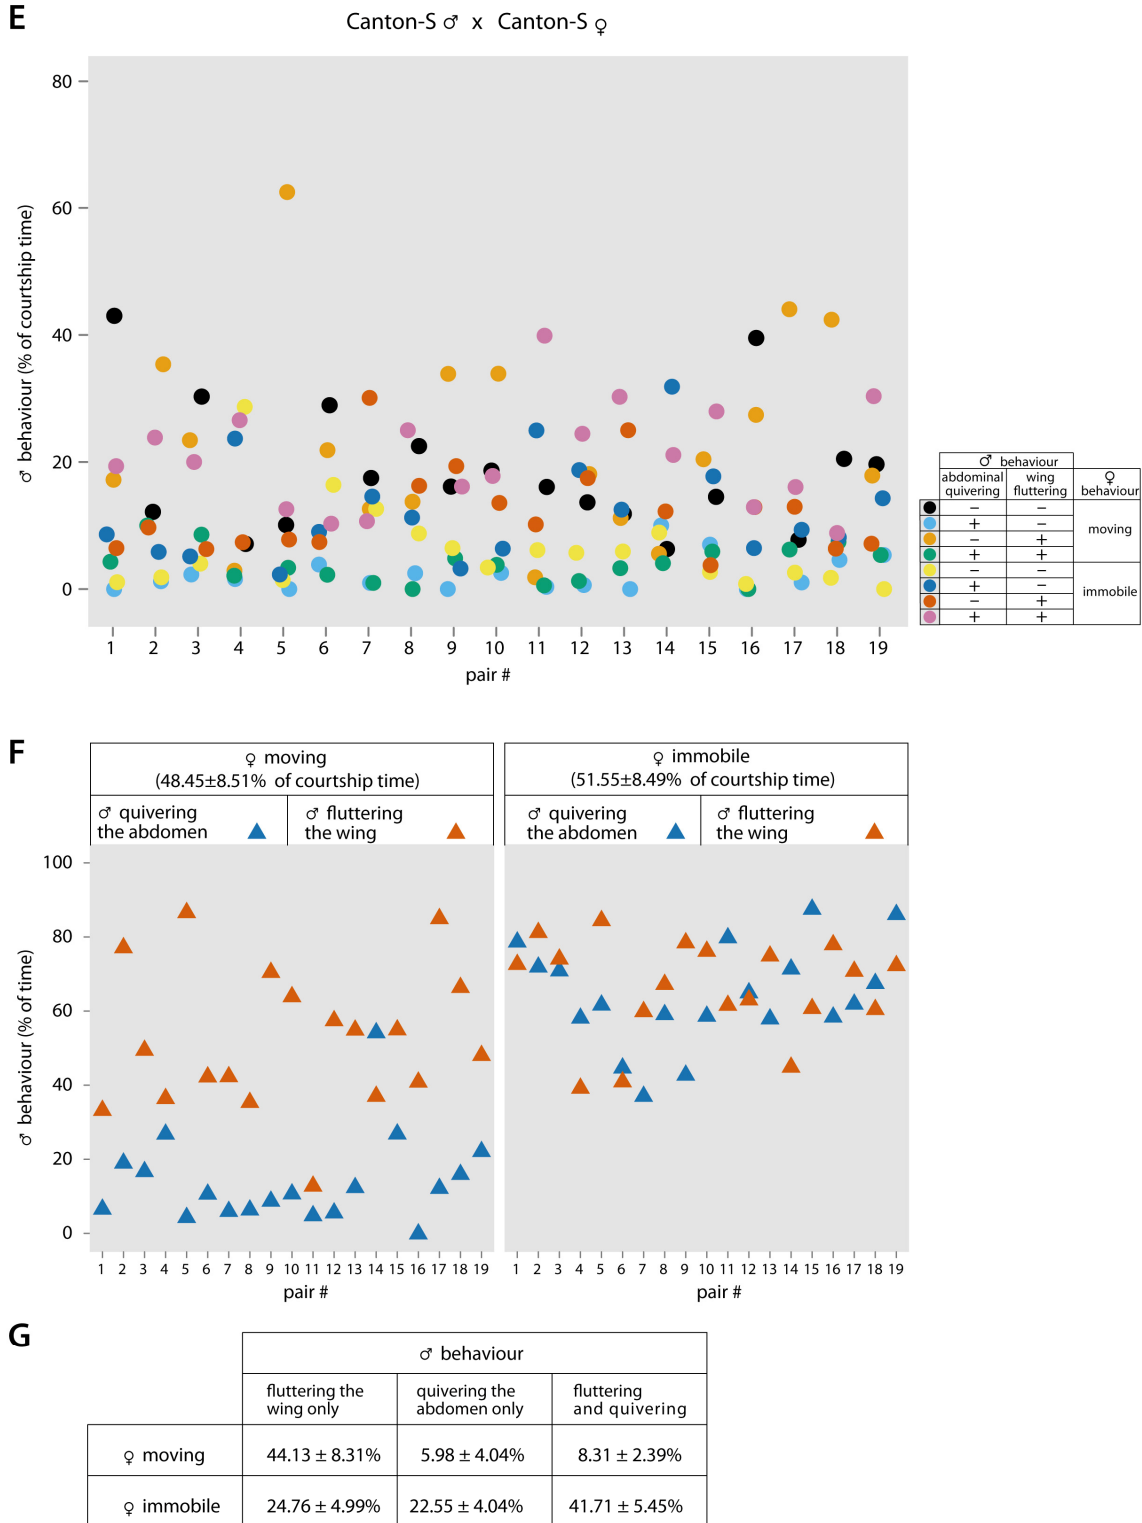

**Figure S1. Analysis of courtship in wildtype flies, Related to Figure 1**  
 (A) Scatterplot showing the percentage of the total courtship time of selected male and female behaviours from beginning of courtship until copulation for each of 30

pairs (x-axis); percentage of courtship time shown on the y-axis. Colours shown as in (B).

**(B)** Table showing the percentage (grand mean) of the total courtship time corresponding to each of 8 behaviours and the durations (grand mean) of the bouts of each behaviour ( $\pm$  shows interval limits for 95% confidence level). Time resolution is 1 second.

**(C)** The upper contingency table shows a summary of the data selected for statistical analysis of association between different behaviours. Nearly all the bouts lasted 1-10 seconds. A small number of much longer spells of one behaviour (those over twice the average bout length) were noted. Since such behaviour is rare, yet has a gross impact on the mean bout length, these data points were excluded as outliers. N is the number of bouts analysed for the combinations of male and female behaviour shown. The lower table shows the results: for example, for M:Q, a very strong association is found between the male (quivering or not, Q) and female mobility (stopping or not, M). However between the male (fluttering or not, F) and female mobility (stopping or not, M) there was a significant but much weaker association, see M:F. No significant associations were found between the two male behaviours (Q:F) or between all three behaviours (M:Q:F).

**(D)** Mosaic plots of different models of association. The only models that are probable are those that include an association between male quivering behaviour and female mobility behaviour, the most probable model is the conditional dependence [M Q][M F].

**(E)** Ethograms of Canton S: 19 pairs are presented as in Figure S1A.

**(F)** The male behaviour of Canton S pairs presented as in Figure 1A.

**(G)** The table breaks down Canton S male behaviour further as in Figure 1B.

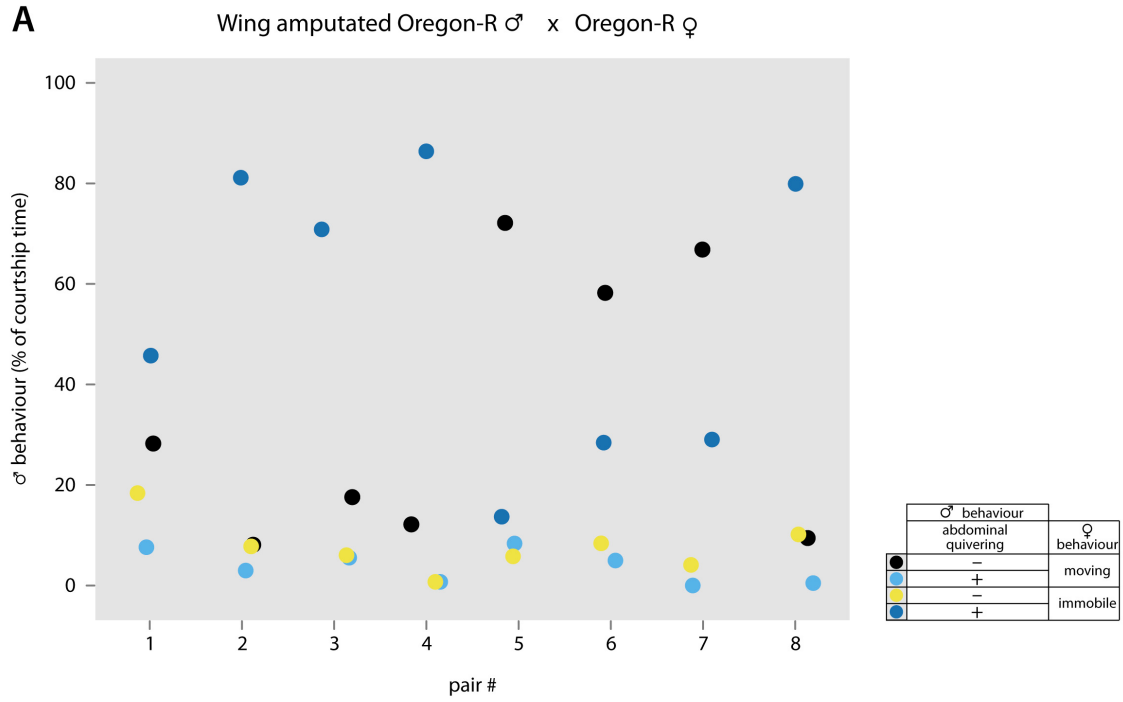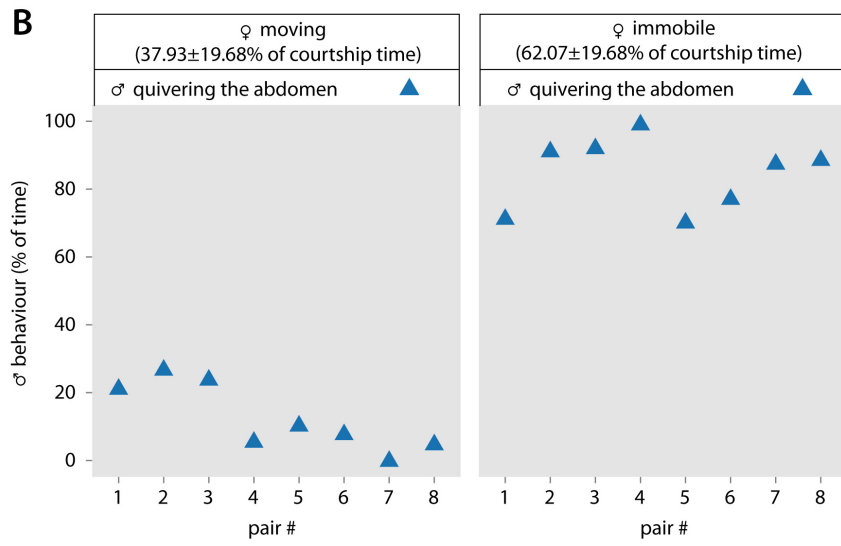

**C**

| ♂ behaviour                |             |
|----------------------------|-------------|
| quivering the abdomen only |             |
| ♀ moving                   | 12.60±6.94% |
| ♀ immobile                 | 84.71±7.29% |

**D** *dsx*<sup>-</sup> ♂ x Oregon-R ♀

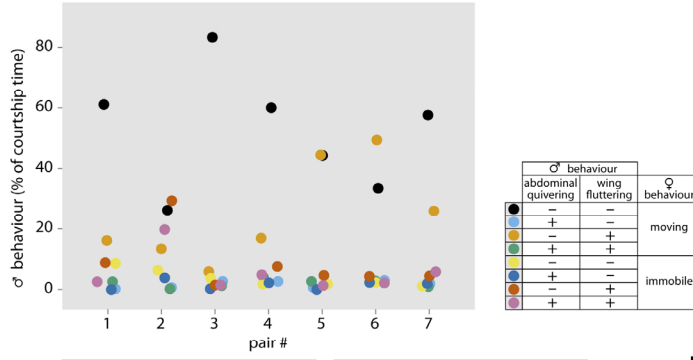

**G** *fru*<sup>-</sup> ♂ x Oregon-R ♀

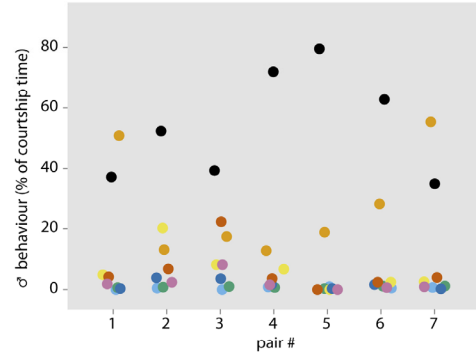

**E**

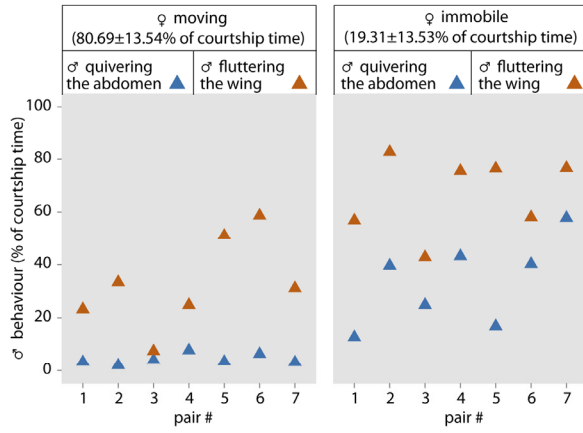

**H**

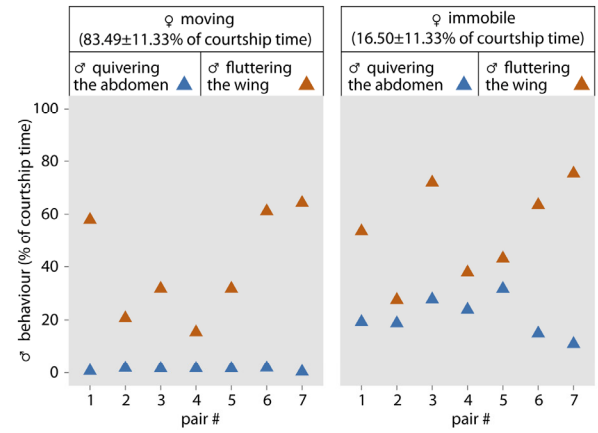

**F**

|            | ♂ behaviour              |                            |                          |
|------------|--------------------------|----------------------------|--------------------------|
|            | fluttering the wing only | quivering the abdomen only | fluttering and quivering |
| ♀ moving   | 30.53 ± 12.66%           | 2.05 ± 0.90%               | 2.44 ± 1.11%             |
| ♀ immobile | 41.83 ± 9.04%            | 8.42 ± 5.95%               | 25.31 ± 7.91%            |

**I**

|            | ♂ behaviour              |                            |                          |
|------------|--------------------------|----------------------------|--------------------------|
|            | fluttering the wing only | quivering the abdomen only | fluttering and quivering |
| ♀ moving   | 36.90 ± 14.05%           | 0.50 ± 0.31%               | 0.98 ± 0.32%             |
| ♀ immobile | 36.12 ± 14.52%           | 20.44 ± 22.77%             | 10.60 ± 4.07%            |

**J** Oregon-R ♂ x Oregon-R ♀ (courtship under IR light)

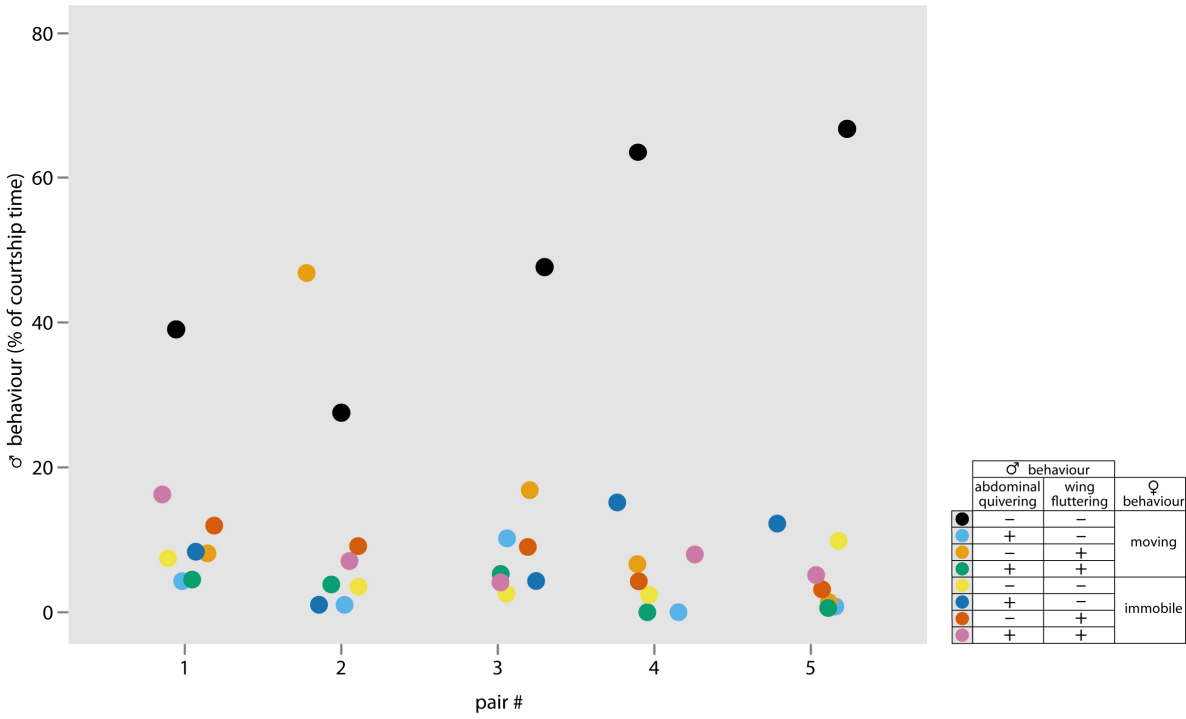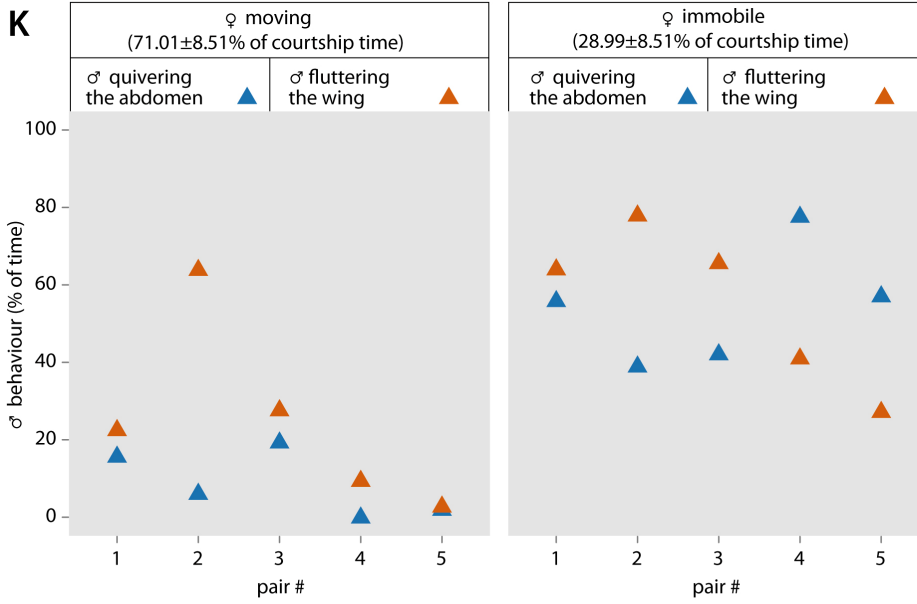

|            | ♂ behaviour              |                            |                          |
|------------|--------------------------|----------------------------|--------------------------|
|            | fluttering the wing only | quivering the abdomen only | fluttering and quivering |
| ♀ moving   | 21.23 ± 19.54%           | 4.57 ± 4.80%               | 4.07 ± 3.09%             |
| ♀ immobile | 27.33 ± 15.95%           | 28.19 ± 14.17%             | 27.04 ± 7.47%            |



**Figure S2. Manipulations that affect the behaviour of males paired with wild type females**

**(A-C)** Wings were amputated in Oregon R males: 8 pairs are presented as in Figure S1A-C.

**(D-F)** *dsx*<sup>-</sup> males: 7 pairs are presented as in Figure S1A-C.

**(G-I)** *fru*<sup>-</sup> males: 7 pairs are presented as in Figure S1A-C.

**(J-L)** Courtship in the dark by wildtype Oregon R: 5 pairs are presented as in Figure S1A-C.

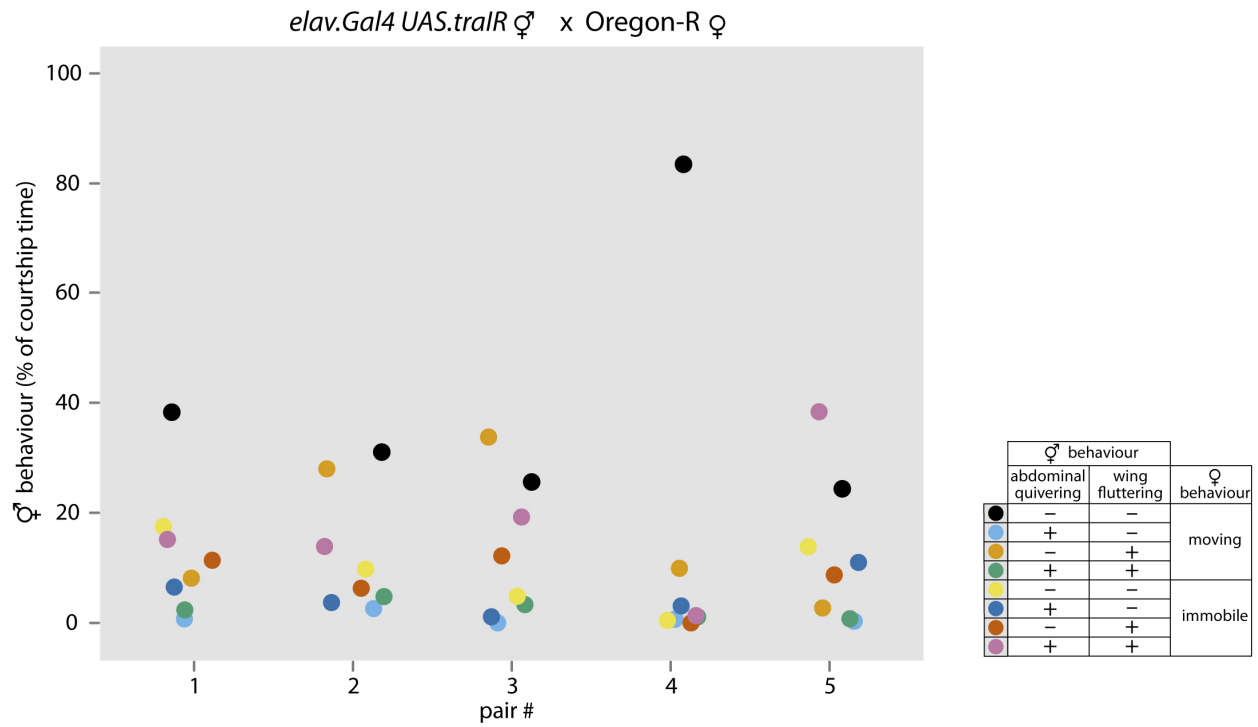

**Figure S3. Related to Figure 2**

Summary of ethograms of courtship between *elav.Gal4 UAS.tralR* females and wildtype females: 5 pairs are presented as in Figure S1A.

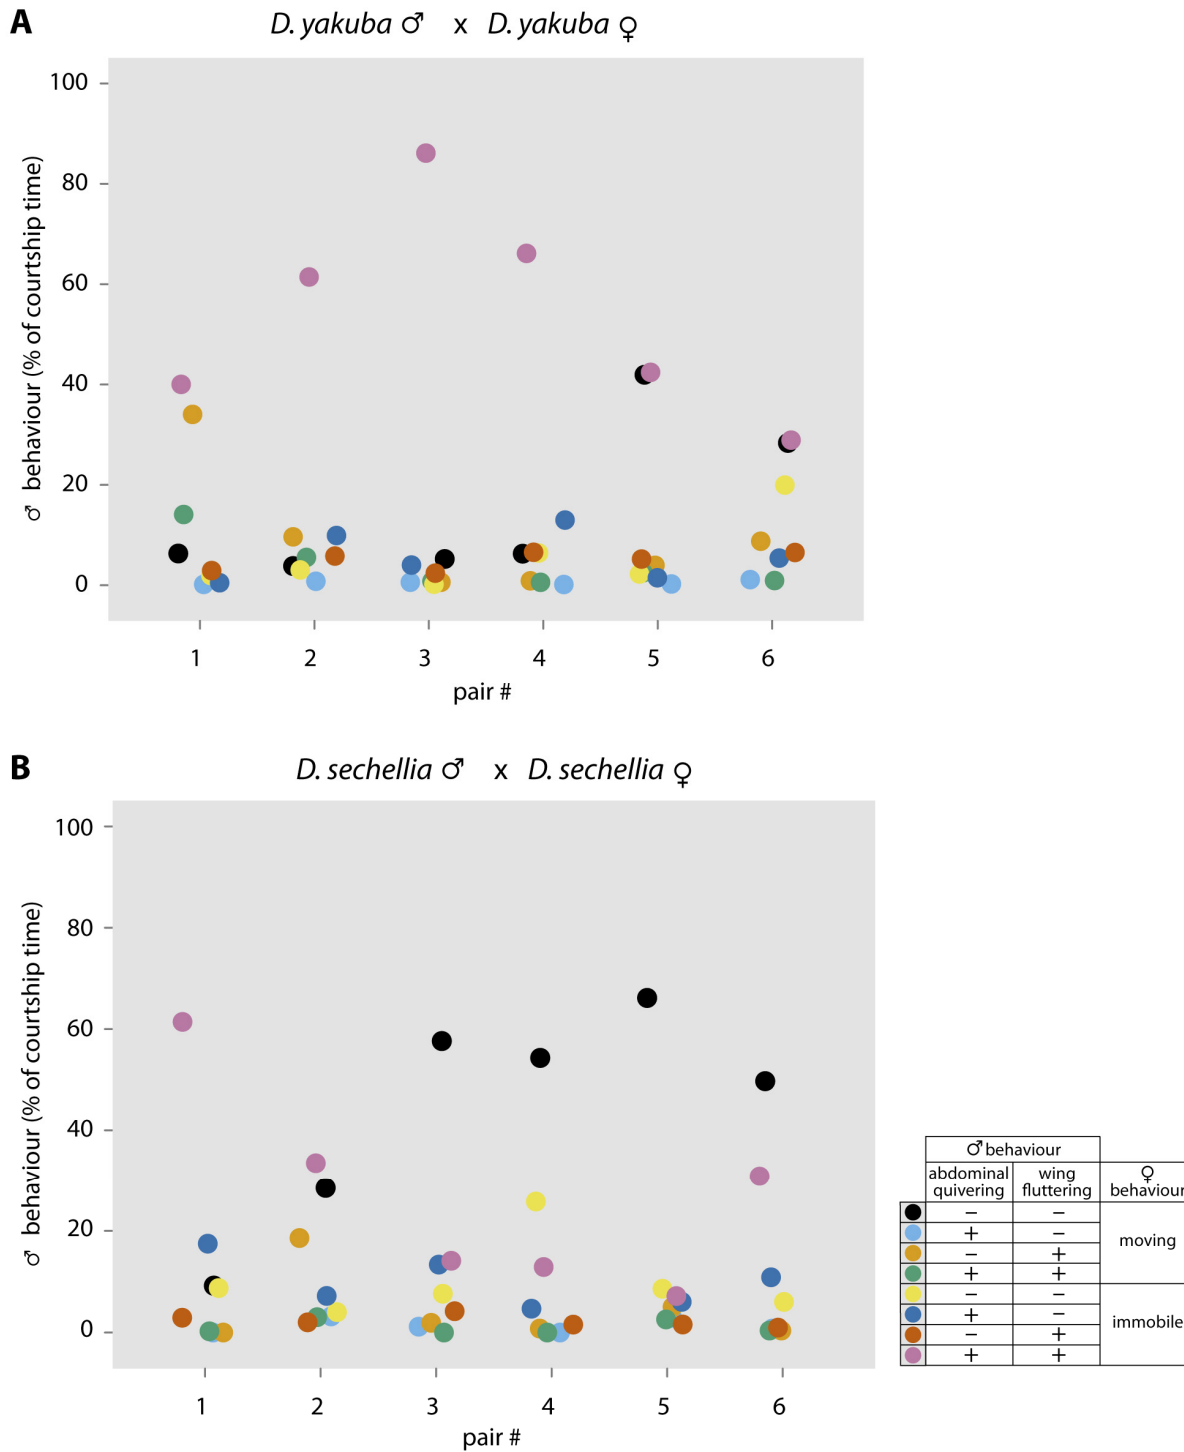

**Figure S4. Other species, Related to Figure 4**

(A) Summary of ethograms of *D. yakuba* courtship: 6 pairs are presented as in Figure S1A.

(B) Summary of ethograms of *D. sechellia* courtship: 6 pairs are presented as in Figure S1A.
